# Supplementary material for: A CT-based Machine Learning Radiomics Model for the Prediction of Gastric Cancer Differentiation and Mechanism Exploration
Source: Research Square preprint supplement (doi:10.21203/rs.3.rs-7782471/v1), 2025-12-30
Supplement: Supplementary file 1 [file 8d6545fbbe820ac1faecc8d6.docx]

**Supplementary Material**

**TABLE S1. Scan Parameters of CT**

| Parameters |  |
| --- | --- |
| Scanner | Discovery 75 (GE Healthcare, USA) |
| Tube voltage (kV) | 120 |
| Tube current (mA) | 250-350 |
| Contrast agent (mgI/mL) | 300 |
| Contrast agent infused dose (mL/kg) | 1.5 |
| Contrast agent infused dose rate (mL/s) | 3 |
| Layer spacing (mm) | 5 |
| Layer thickness (mm) | 5 |
| Reconstruction dimension (mm) | 1.25 |
| Pitch | 1.375:1 |
